# Supplementary figures and images for: Sciadonic acid attenuates high-fat diet-induced bone metabolism disorders in mice
Source: Royal Society of Chemistry journal article supplement (doi:10.1039/d3fo04527g), 2024-01-01

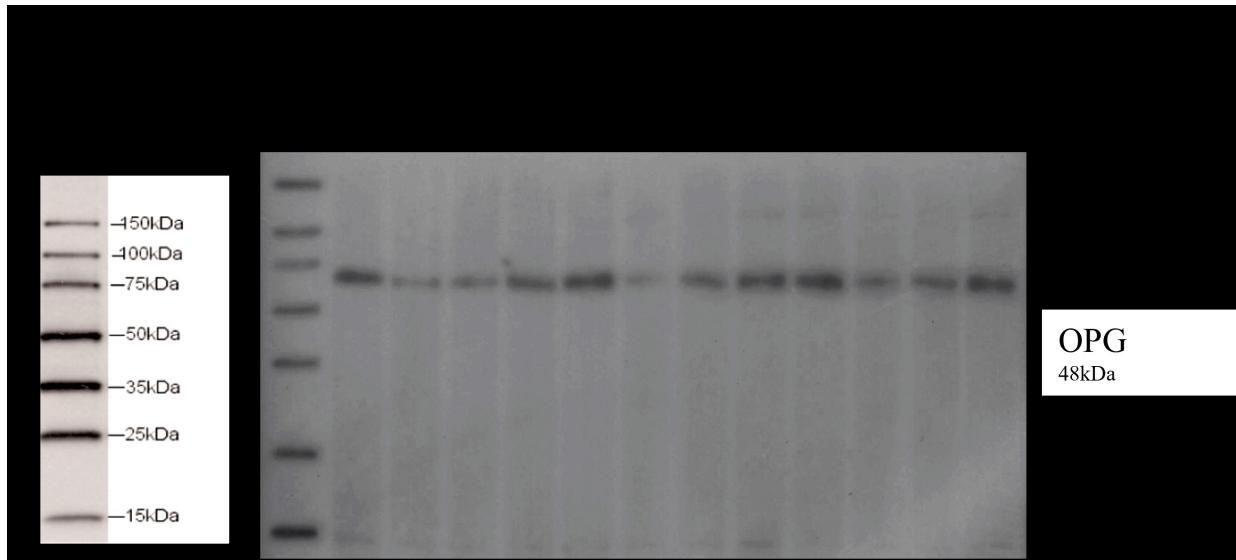

Supplement: d3fo04527g1.pdf [file d3fo04527g1.pdf]

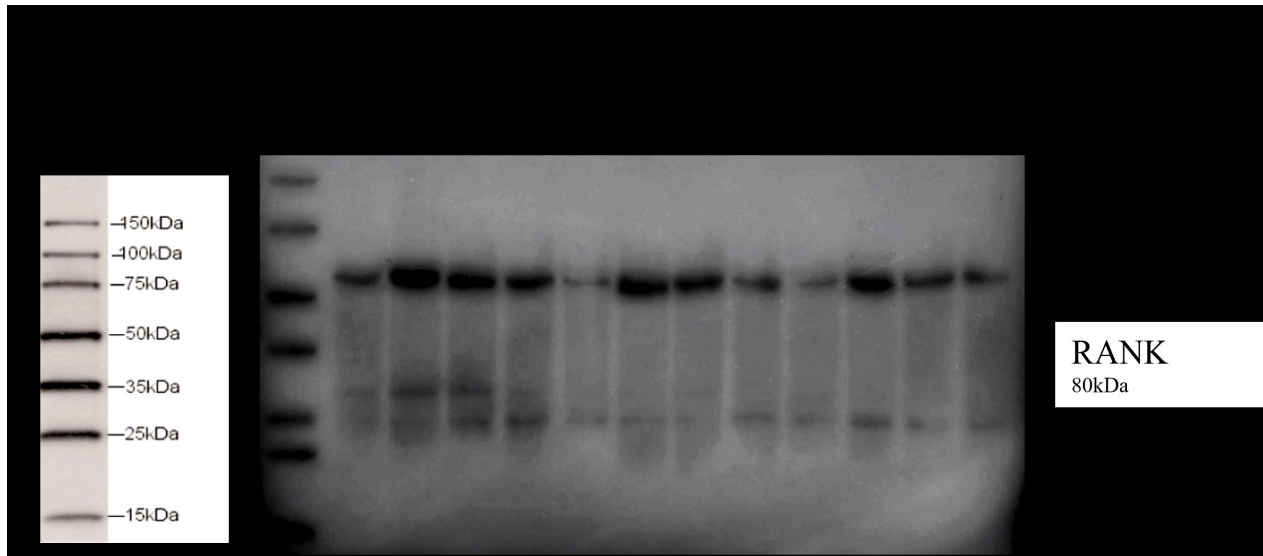

Supplement: d3fo04527g2.pdf [file d3fo04527g2.pdf]

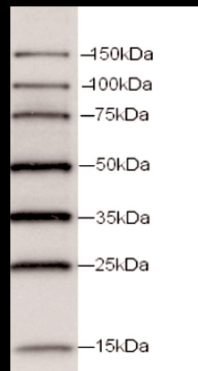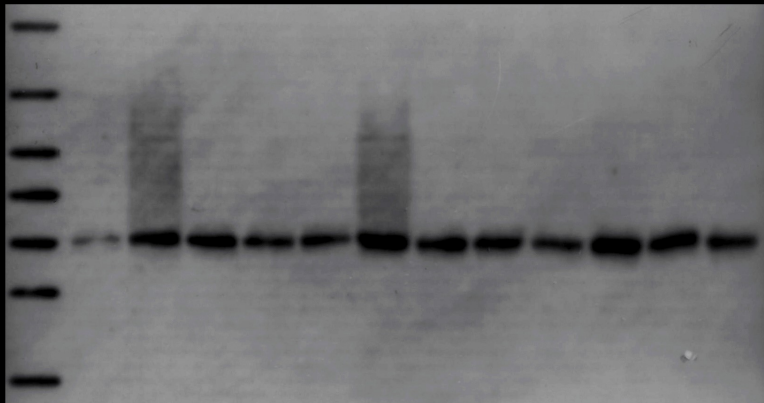

**RANKL**  
35kDa

Supplement: d3fo04527g3.pdf [file d3fo04527g3.pdf]

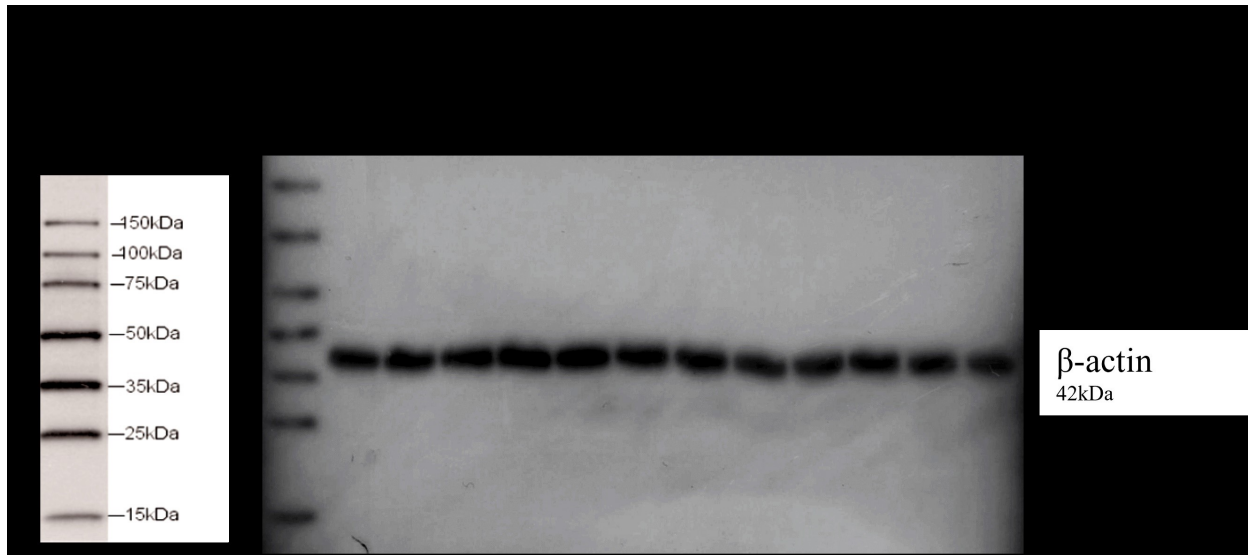

Supplement: d3fo04527g4.pdf [file d3fo04527g4.pdf]
